# Supplementary material for: Assessing Patient-Reported Satisfaction With Care and Documentation Time in Primary Care Through AI-Driven Automatic Clinical Note Generation: Protocol for a Proof-of-Concept Study
Source: JMIR Res Protoc. 2025 Apr 7;14:e66232. doi: 10.2196/66232 (PMC12012399; doi:10.2196/66232)
Supplement: Multimedia Appendix 2 [file resprot_v14i1e66232_app2.docx]

**Appendix II: Health professional satisfaction survey**

| 1. **Rate the following Relisten aspects from 1 to 6**  |  | 1 (not at all) | 2 | 3 | 4 | 5 | 6 (very much) | | --- | --- | --- | --- | --- | --- | --- | | The usefulness of the summary of the relevant fields of the medical record |  |  |  |  |  |  | | Understanding the summary of the fields relevant to the medical record |  |  |  |  |  |  | | Reducing the administrative burden |  |  |  |  |  |  | | Reducing the time spent on typing in the health information system |  |  |  |  |  |  | | Efficient medical data collection has been improved |  |  |  |  |  |  |  1. **Were you able to pay attention to the patient during the entire visit?**  - Yes, much more - Yes, but not significantly - No, I have paid the same attention as before - Don't know / No answer  1. **Did you take notes during the visits?**  - No, I have not taken any notes - Yes, I have taken fewer notes, but I have still written down some information - The same as before - Don't know / No answer  1. **Did you have any incidents during the visit due to the information systems?**  - Yes, resolved by the technical service promptly - Yes, they were resolved after a few days - No - Don't know / No answer  1. **In general, how much interest do you have in using Relisten?**  | 1 (no interest) | 2 | 3 | 4 | 5 | 6 (high interest) | | --- | --- | --- | --- | --- | --- |  1. **On a scale of 1 to 6, how useful do you consider the use of an assistant in the visit in the following cases:**  |  | 1 (not at all) | 2 | 3 | 4 | 5 | 6 (very much) | Not applicable | | --- | --- | --- | --- | --- | --- | --- | --- | | First visit |  |  |  |  |  |  |  | | Chronic patient follow-up |  |  |  |  |  |  |  | | Emergency visit (unscheduled) |  |  |  |  |  |  |  | |
| --- | --- | --- | --- | --- | --- | --- | --- | --- | --- | --- | --- | --- | --- | --- | --- | --- | --- | --- | --- | --- | --- | --- | --- | --- | --- | --- | --- | --- | --- | --- | --- | --- | --- | --- | --- | --- | --- | --- | --- | --- | --- | --- | --- | --- | --- | --- | --- | --- | --- | --- | --- | --- | --- | --- | --- | --- | --- | --- | --- | --- | --- | --- | --- | --- | --- | --- | --- | --- | --- | --- | --- | --- | --- | --- | --- | --- | --- | --- | --- | --- |

1. **In general, would you recommend the use of Relisten to other colleagues?**

| 1 (not at all) | 2 | 3 | 4 | 5 | 6 (very much) |
| --- | --- | --- | --- | --- | --- |
